# Supplementary material for: Extracellular Vesicles from Different Sources of Mesenchymal Stromal Cells Have Distinct Effects on Lung and Distal Organs in Experimental Sepsis
Source: MDPI journal article supplement (doi:10.3390/ijms24098234), 2023-05-04
Supplement: s1 [file s1]

## Supplementary digital content

### Materials and Methods

#### *Animal Preparation and Experimental Protocol*

Thirty male C57BL/6 mice (25–30 g, 8–12 weeks old) were allocated to two main groups: sham (SHAM) and experimental sepsis (SEPSIS) induced by cecal ligation and puncture (CLP) surgery[1]. Briefly, animals were anesthetized with intraperitoneal (i.p.) injection of ketamine (25 mg/kg, Cristália, Itapira, SP, Brazil) and xylazine (2 mg/kg; Xilazin, Syntec, Barueri, SP, Brazil) and a midline laparotomy (2-cm incision) was performed. The cecum was carefully isolated and ligated below the ileocecal valve with a 3-0 cotton suture to prevent obstruction. Then, the cecum was punctured once with an 18-gauge needle. and the animals were left to recover from anesthesia[1]. In sham surgery, the abdominal cavity was opened, and the cecum was isolated without ligation or puncture. Postoperative care was similar in both groups and consisted of a subcutaneous injection of tramadol hydrochloride (20 mg/g body weight; Cristália, Itapira, SP, Brazil) in 1 mL of warm (37 °C) normal saline (NaCl 0.9%). All animals subjected to CLP surgery received antibiotics (imipenem/cilastatin, 10 mg/kg, i.p., Cristália, Itapira, SP, Brazil) 6 and 24 h after induction of sepsis, as recommended for preclinical studies assessing potential human therapeutics[2]. The well-being of the mice was constantly monitored based on predetermined clinical findings.[3]

Twenty-four hours after induction of sepsis, animals with sepsis (SEPSIS) were randomly assigned by sealed envelopes to the following subgroups ( $n = 6$ /subgroup): (1) sterile saline solution (SAL, 70  $\mu$ L i.v.); (2) extracellular vesicle (EVs) released from  $3 \times 10^6$  mesenchymal stromal cells (MSCs) derived from bone marrow (70  $\mu$ L i.v.); (3) EVs released from  $3 \times 10^6$  MSCs derived from adipose tissue (70  $\mu$ L i.v.); and (4) EVs released from  $3 \times 10^6$  MSCs derived from lung tissue (70  $\mu$ L i.v.) (Fig. 1). For administration of EVs, animals were anesthetized with sevoflurane (1.0%, Sevoflurane; Cristália, Itapira, SP, Brazil), supported in a supine position, and the jugular vein was carefully exposed. EVs were instilled i.v. and the neck skin was sutured. The animal was then placed in the prone position on the heating bed and observed until return of normal spontaneous breathing. Twenty-four hours after

treatment, lung, liver, and kidney histology was analyzed, and protein and mRNA levels related to organ damage were evaluated.

## *Histology*

### *Light Microscopy of Lungs, Liver, and Kidney*

Animals were euthanized by sodium thiopental injection (50 mg/kg i.v.; Thiopentax; Cristália, Itapira, SP, Brazil). A laparotomy was performed, and heparin (1000 IU, Cristália, Itapira, SP, Brazil) was injected into the vena cava. The trachea was clamped at end expiration (positive end-expiratory pressure = 2 cmH<sub>2</sub>O), and the abdominal aorta and vena cava were sectioned, resulting in a massive hemorrhage that quickly killed the animals. The left lung, a slice of the liver, and the left kidney were then removed, fixed in 3% buffered formaldehyde (Isofar, Duque de Caxias, RJ, Brazil) and embedded in paraffin (EasyPath Diagnósticos, Insaiaatuba, SP, Brazil). Sections (4 µm thick) were cut and stained with hematoxylin (Isofar, Duque de Caxias, RJ, Brazil) and eosin (Vetec Química, Duque de Caxias, RJ, Brazil) (lung and liver) or periodic acid-Schiff (Vetec Química, Duque de Caxias, RJ, Brazil) (kidney). Slides were scanned with a Panoramic MIDI II scanner (3DHISTECH, Budapest, Hungary).

Diffuse alveolar damage (DAD) was quantified in scanned photomicrographs at magnifications of  $\times 100$ ,  $\times 200$ , and  $\times 400$ , obtained from ten non-overlapping fields of view per animal, using a weighted scoring system as described elsewhere[4]. Briefly, the following histologic features were graded for severity from 0 (no effect) to 4 (maximum severity): (1) edema, (2) alveolar collapse, (3) inflammation, and (4) septal thickening. In addition, the extent of each histologic feature per field of view was graded from 0 (no visible evidence) to 4 (complete involvement). Scores were calculated as the product of the severity and extent of each feature in a range of 0–16. The cumulative DAD score was calculated as the sum of each score characteristic and ranged from 0 to 64.

Liver histologic assessment was performed using scanned photomicrographs at a magnification of  $\times 400$  obtained from ten non-overlapping fields per animal, using Dear's adapted score[5]. Briefly, scores of 0–4 were used to represent hepatocyte lesions: 0, no visible evidence of vacuolization; 1, vacuolization present in  $>1\%$ – $25\%$  of the tissue area; 2,

>25%–50%; 3, 50%–75%; 4, vacuolization present in >75% of the tissue area. Inflammation in liver was quantified by counting the total cells in sinusoids.

Kidney histologic assessment was performed using scanned photomicrographs at a magnification of  $\times 400$ , obtained from ten non-overlapping fields of view per animal, based on pathology scores developed by a specialist (C.M.T.). Briefly, scores of 0–4 were used to represent tubular cell damage, defined as loss of brush border: 0, no visible evidence; 1, lesion present in >1%–25% of the tissue area; 2, >25%–50%; 3, 50%–75%; 4, lesion present in >75% of the tissue area. ImagePro software (version 4.0; Media Cybernetics, Silver Spring, MD, USA) was used to record the areas occupied by interstitial edema, which were then divided by the total area examined.

Lung, kidney, and liver histologic scores were evaluated by three blinded examiners (N.G.B., J.D.S., C.M.T.).

## References

- [1] J. D. Silva, G. P. Oliveira, and P. R. M. et al Rocco, “Respiratory and Systemic Effects of LASSBio596 Plus Surfactant in Experimental Acute Respiratory Distress Syndrome,” *Cellular Physiology and Biochemistry*, vol. 38, pp. 821–835, 2016, doi: 10.1159/000443037.
- [2] M. F. Osuchowski *et al.*, “Minimum quality threshold in pre-clinical sepsis studies (mqtipss): An international expert consensus initiative for improvement of animal modeling in sepsis,” *Shock*, vol. 50, no. 4, pp. 377–380, 2018, doi: 10.1097/SHK.0000000000001212.
- [3] et al. Gonçalves-de-Albuquerque CF, Medeiros- de-Moraes IM, Oliveira FMdJ, Burth P, Bozza PT, Castro Faria MV, “Omega-9 Oleic Acid Induces Fatty Acid Oxidation and Decreases Organ Dysfunction and Mortality in Experimental Sepsis,” *PLoS One*, vol. 11, no. 4, pp. 1–18, 2016, doi: 10.1371/journal.pone.0153607.
- [4] T. Kiss *et al.*, “Comparison of different degrees of variability in tidal volume to prevent deterioration of respiratory system elastance in experimental acute lung inflammation,” *Br J Anaesth*, vol. 116, no. 5, pp. 708–715, 2016, doi: 10.1093/bja/aew093.

- [5] J. W. Dear *et al.*, “Sepsis-induced organ failure is mediated by different pathways in the kidney and liver: acute renal failure is dependent on MyD88 but not renal cell apoptosis James,” *Kidney Int*, vol. 69, no. 5, pp. 832–836, 2008.

**Table S1.** PCR Primers

| Gene  | Forward                               | Reverse                               |
|-------|---------------------------------------|---------------------------------------|
| IL-18 | 5'-ACA GTG AAG TCG GCC AAA GT-3'      | 5'-TCT TGG CCC AGG AAC AAT GG-3'      |
| IL-6  | 5'-TCT CTG GGA AAT CGT GGA A-3'       | 5'-TCT GCA AGT GCA TCA TCG T-3'       |
| IL-10 | 5'-ATC CAA GAC AAC ACT ACT ATA-3'     | 5'-TAA ATA TCC TCA AAG TCC C-3'       |
| KIM-1 | 5'-GCT AGC ATG CAT CCT CAA GTG GTC-3' | 5'-CTC GAG TTA GTC CGT GGC ATA AAG-3' |
| PD-1  | 5'-CGT CCC TCA GTC AAG AGG AG-3'      | 5'-GTC CTT AGA AGT GCC CAA CA-3'      |
| KIM-1 | 5'-GCT GCT ACT GCT CCT TGT GA-3'      | 5'-GGA AGG CAA CCA CGC TTA GA-3'      |
| 36B4  | 5'-AAC CCA GTT CTG GAG AAA C-3'       | 5'-GTT CTG AGC TCC CAC AGT GA-3'      |

IL, interleukin; PD-1, programmed death 1; KIM-1, kidney injury molecule; 36B4, acidic ribosomal phosphoprotein P0.

**Table S2.** The Proteins Identified with Significant Intensity

|           |                                                                      |
|-----------|----------------------------------------------------------------------|
| Actg1     | actin cytoplasmic 2                                                  |
| AldoA     | fructose biphosphate aldolase A                                      |
| Anxa5     | annexin A5                                                           |
| Anxa6     | annexin A6                                                           |
| Atp5a1    | ATP synthase subunit alpha, mitochondrial                            |
| C3        | complement C3                                                        |
| Calr      | calreticulin                                                         |
| Col12a1   | collagen alpha 1(XII) chain                                          |
| Col1a1    | collagen alpha 1                                                     |
| Cxcl12    | stromal cell-derived factor 1                                        |
| Eef2      | elongation factor 2                                                  |
| Fbln2     | fibulin 2                                                            |
| Fn1       | fibronectin isoform 1                                                |
| Fn2       | fibronectin isoform 2                                                |
| H2AC12    | histone H2A type 1H                                                  |
| Hist1h2ah | histone H2A type 1H                                                  |
| Hsp90b1   | endoplasmin                                                          |
| HspA5     | 78 kDa glucose-regulated protein                                     |
| Hspg2     | basement membrane-specific heparan sulfate proteoglycan core protein |
| Lamc1     | laminin subunit gamma 1                                              |
| Lox       | protein lysine 6 oxidase                                             |
| Lrif1     | ligand-dependent nuclear receptor interacting factor 1               |
| Mdh2      | malate dehydrogenase 2                                               |
| Mif       | macrophage migration inhibitory factor                               |
| Myh9      | myosin 9                                                             |
| Myl12a    | myosin light chain 12A                                               |
| Myl6      | myosin light polypeptide 6                                           |
| Nid 1     | nidogen 1                                                            |
| Pdia3     | protein disulfide isomerase A3                                       |
| Plac8     | placenta specific 8                                                  |
| Rps5      | ribosomal protein S5                                                 |
| S100A4    | S100 calcium-binding protein A4                                      |
| Thbs1     | thrombospondin 1                                                     |
| Tnc       | tenascin                                                             |
| Tpm1      | tropomyosin alpha-1 chain                                            |
| Vcp       | transitional endoplasmic reticulum ATPase                            |

**Table S3. WikiPathways: Pathway Enrichment Analysis of Statistically Abundant Proteins**

| Source  | Regulation | Term                                                   | <i>P</i> value | Adjusted <i>P</i> value | Odds Ratio | Combined Score | Genes        |
|---------|------------|--------------------------------------------------------|----------------|-------------------------|------------|----------------|--------------|
| BM/ADxL | Up         | IL-9 signaling pathway WP10                            | 0.003596       | 0.004642964             | 434.2174   | 2443.769793    | VCP          |
| BM/ADxL | Up         | Prostaglandin synthesis and regulation WP374           | 0.004643       | 0.004642964             | 332.7833   | 1787.845974    | ANXA5        |
| BM/ADxL | Down       | Inflammatory response pathway WP458                    | 0.007478       | 0.029119416             | 172.1207   | 842.6622961    | THBS1        |
| BM/ADxL | Down       | Striated muscle contraction WP216                      | 0.0112         | 0.029119416             | 113.358    | 509.1809645    | TPM1         |
| BM/ADxL | Down       | TGF- $\beta$ signaling pathway WP113                   | 0.012934       | 0.029119416             | 97.76471   | 425.0726939    | THBS1        |
| BM/ADxL | Down       | p53 signaling WP2902                                   | 0.01664        | 0.029119416             | 75.48864   | 309.1988807    | THBS1        |
| BM/ADxL | Down       | Calcium regulation in the cardiac cell WP553           | 0.036217       | 0.050703935             | 33.98801   | 112.7798428    | CALR         |
| BM/ADxL | Down       | Focal adhesion WP85                                    | 0.045406       | 0.052974231             | 26.91712   | 83.23043532    | THBS1        |
| BM/ADxL | Down       | Focal adhesion-PI3K-Akt-mTOR-signaling pathway WP2841  | 0.078425       | 0.078425076             | 15.22601   | 38.7594974     | THBS1        |
| AD/BMxL | Up         | Striated muscle contraction WP216                      | 0.022278       | 0.07086001              | 50.36869   | 191.6095305    | TPM1         |
| AD/BMxL | Up         | Glycolysis and gluconeogenesis WP157                   | 0.025215       | 0.07086001              | 44.31111   | 163.0792417    | ALDOA        |
| AD/BMxL | Up         | Oxidative phosphorylation WP1248                       | 0.030578       | 0.07086001              | 36.30055   | 126.5975833    | ATP5A1       |
| AD/BMxL | Up         | Primary focal segmental glomerulosclerosis FSGS WP2573 | 0.03543        | 0.07086001              | 31.17214   | 104.1210777    | MYH9         |
| AD/BMxL | Up         | Calcium regulation in the cardiac cell WP553           | 0.071131       | 0.087693392             | 15.10198   | 39.91798491    | CALR         |
| AD/BMxL | Up         | MAPK signaling pathway WP493                           | 0.076732       | 0.087693392             | 13.94655   | 35.80694267    | HSPA5        |
| AD/BMxL | Up         | Focal adhesion WP85                                    | 0.088762       | 0.088761986             | 11.96014   | 28.96504081    | MYL6         |
| AD/BMxL | Down       | Inflammatory response pathway WP458                    | 0.007478       | 0.023180083             | 172.1207   | 842.6622961    | FN1          |
| AD/BMxL | Down       | Prostaglandin synthesis and regulation WP374           | 0.007727       | 0.023180083             | 166.375    | 809.0939625    | ANXA5        |
| AD/BMxL | Down       | Regulation of actin cytoskeleton WP523                 | 0.03743        | 0.055932453             | 32.8543    | 107.9354587    | FN1          |
| AD/BMxL | Down       | Focal adhesion WP85                                    | 0.045406       | 0.055932453             | 26.91712   | 83.23043532    | FN1          |
| AD/BMxL | Down       | Chemokine signaling pathway WP2292                     | 0.04661        | 0.055932453             | 26.19841   | 80.32255388    | CXCL12       |
| AD/BMxL | Down       | Focal adhesion-PI3K-Akt-mTOR-signaling pathway WP2841  | 0.078425       | 0.078425076             | 15.22601   | 38.7594974     | FN1          |
| L/BMxAD | Up         | Inflammatory response pathway WP458                    | 2.17E-05       | 1.52E-04                | 475.4048   | 5105.230681    | COL1A1;THBS1 |
| L/BMxAD | Up         | Focal adhesion WP85                                    | 8.36E-04       | 0.002924434             | 72.17486   | 511.5333734    | COL1A1;THBS1 |
| L/BMxAD | Up         | Osteoblast WP238                                       | 0.002498       | 0.004432993             | 555.1667   | 3326.770642    | COL1A1       |

|         |    |                                                                   |          |             |          |             |              |
|---------|----|-------------------------------------------------------------------|----------|-------------|----------|-------------|--------------|
| L/BMxAD | Up | Focal adhesion-PI3K-Akt-mTOR-signaling pathway WP2841             | 0.002533 | 0.004432993 | 40.73085 | 243.5010775 | COL1A1;THBS1 |
| L/BMxAD | Up | Dysregulated miRNA targeting in insulin/PI3K-AKT signaling WP3855 | 0.006484 | 0.009077165 | 199.7    | 1006.181577 | COL1A1       |
| L/BMxAD | Up | TGF- $\beta$ signaling pathway WP113                              | 0.012934 | 0.015089367 | 97.76471 | 425.0726939 | THBS1        |
| L/BMxAD | Up | p53 signaling WP2902                                              | 0.01664  | 0.016639666 | 75.48864 | 309.1988807 | THBS1        |

AD, adipose tissue; BM, bone marrow; L, lung tissue.

**Figure S1. Cytokines in liver parenchyma**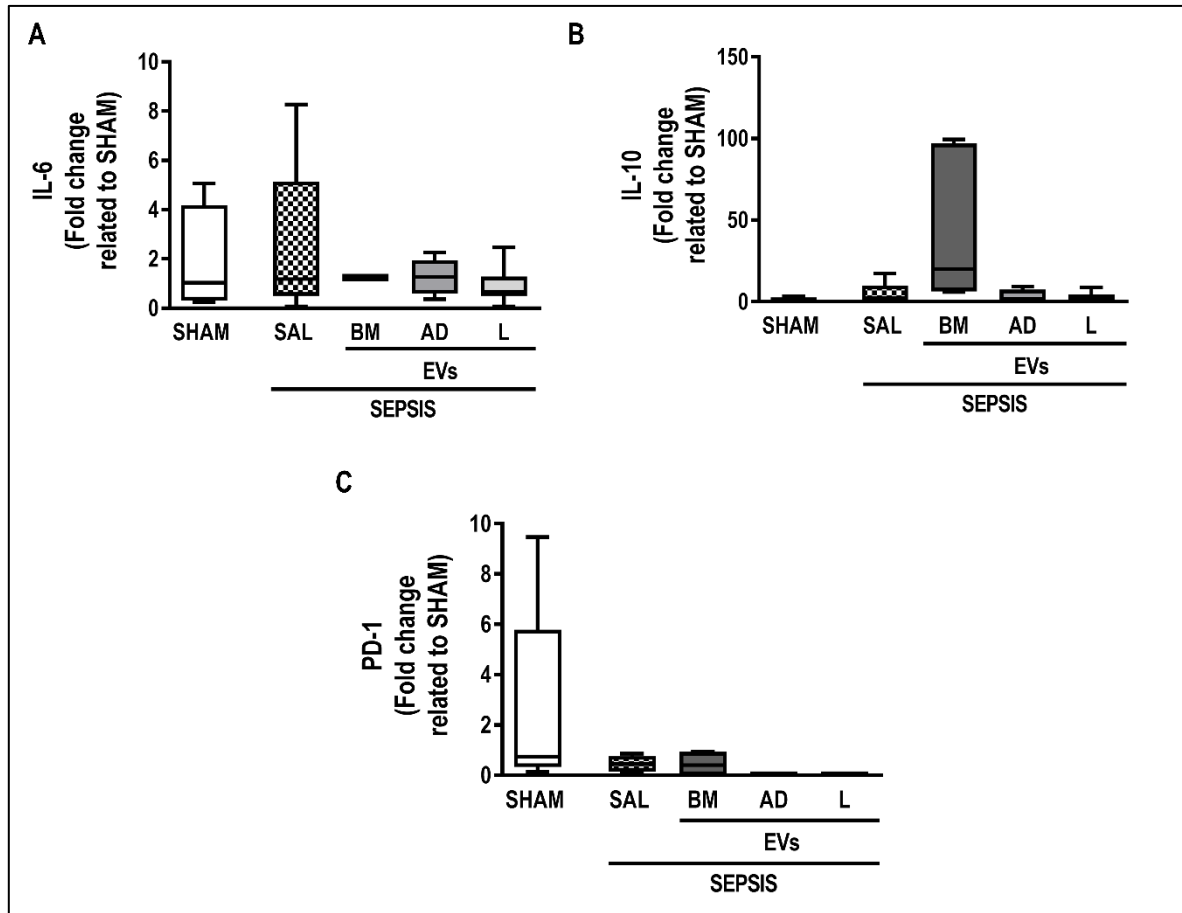

Figure S1. (A) interleukin (IL)-6 levels; (B) IL-10; and (C) programmed cell death protein (PD)-1 levels quantified by PCR.
